# Supplementary material
Source: PubMed Central journal article supplement (PMC5587376)
Supplement: NIHMS881916-supplement-1.pdf [file NIHMS881916-supplement-1.pdf]

**Supplementary Table 1: Primary untreated (Prim/UT) KIT<sup>+</sup> (n = 8) vs. Metastatic resistant (Met/Res) KIT<sup>+</sup> (n = 4), pathways with *P* < 0.05.**

| Rank | Pathway Name                                 | # Input Genes in Pathway | # Pathway Genes on Chip | Input Gene Name | <i>P</i> -value |
|------|----------------------------------------------|--------------------------|-------------------------|-----------------|-----------------|
| 1    | <b>Cell cycle</b>                            | 14                       | 118                     |                 | 9.003E-06       |
| 2    | <b>DNA replication</b>                       | 8                        | 36                      |                 | 3.078E-05       |
| 3    | <b>Wnt signaling pathway</b>                 | 2                        | 152                     | Dkk4, Wnt5A     | 7.296E-05       |
| 4    | P53 signaling pathway                        | 9                        | 69                      |                 | 2.184E-04       |
| 5    | TGF-beta signaling pathway                   | 1                        | 87                      |                 | 7.245E-04       |
| 6    | Basal cell carcinoma                         | 1                        | 55                      |                 | 1.181E-03       |
| 7    | Adherens junction                            | 3                        | 78                      |                 | 1.307E-03       |
| 8    | Pancreatic cancer                            | 1                        | 72                      |                 | 1.612E-02       |
| 9    | <b>Phosphatidylinositol signaling system</b> | 3                        | 76                      |                 | 2.323E-02       |
| 10   | Basal excision repair                        | 4                        | 36                      |                 | 4.063E-2        |
