# Supplementary material
Source: PubMed Central journal article supplement (PMC5587376)
Supplement: NIHMS881916-supplement-2.pdf [file NIHMS881916-supplement-2.pdf]

**Supplementary Table 2: Primary untreated (Prim/UT) KIT+ ( n = 8 ) vs. Metastatic resistant (Met/Res) KIT+ ( n = 4). Significant genes with a False Discovery Rate of < 0.05 and a fold change > 2.0**

| Gene Symbol | Gene Title                                                              | Adj. p-value   | Fold change ( Prim/UT to Met/Res) | Affymetrix ID    |
|-------------|-------------------------------------------------------------------------|----------------|-----------------------------------|------------------|
| HEPH        | hephaestin                                                              | 1.8E-03        | -60.6                             | 203903_s_at      |
| GPR88       | G protein-coupled receptor 88                                           | 1.8E-02        | -56.0                             | 220313_at        |
| SPON1       | spondin 1, extracellular matrix protein                                 | 4.5E-02        | -48.2                             | 213993_at        |
| SATB1       | SATB homeobox 1                                                         | 3.6E-03        | -41.1                             | 203408_s_at      |
| ISL1        | ISL LIM homeobox 1                                                      | 2.7E-02        | -39.9                             | 206104_at        |
| NELL1       | NEL-like 1 (chicken)                                                    | 1.2E-02        | -39.8                             | 206089_at        |
| RAI2        | retinoic acid induced 2                                                 | 1.3E-02        | -30.8                             | 219440_at        |
| TMEM47      | transmembrane protein 47                                                | 4.9E-02        | -29.0                             | 209656_s_at      |
| DIRAS3      | DIRAS family, GTP-binding RAS-like 3                                    | 3.1E-02        | -26.8                             | 215506_s_at      |
| SCRG1       | stimulator of chondrogenesis 1                                          | 8.3E-03        | -24.2                             | 205475_at        |
| SLC24A3     | solute carrier family 24 (sodium/potassium/calcium exchanger), member 3 | 1.6E-02        | -23.7                             | 57588_at         |
| DIO2        | deiodinase, iodothyronine, type II                                      | 1.0E-02        | -22.7                             | 203699_s_at      |
| SLC24A3     | solute carrier family 24 (sodium/potassium/calcium exchanger), member 3 | 1.5E-02        | -21.5                             | 219090_at        |
| GULP1       | GULP, engulfment adaptor PTB domain containing 1                        | 5.2E-03        | -20.5                             | 204237_at        |
| GULP1       | GULP, engulfment adaptor PTB domain containing 1                        | 4.4E-03        | -19.9                             | 204235_s_at      |
| DIO2        | deiodinase, iodothyronine, type II                                      | 1.0E-02        | -19.7                             | 203700_s_at      |
| <b>DKK4</b> | <b>dickkopf homolog 4 (<i>Xenopus laevis</i>)</b>                       | <b>4.7E-03</b> | <b>-18.8</b>                      | <b>206619_at</b> |
| LPHN3       | latrophilin 3                                                           | 3.1E-02        | -18.6                             | 209866_s_at      |
| TMEM47      | transmembrane protein 47                                                | 3.7E-02        | -17.6                             | 209655_s_at      |
| ALCAM       | activated leukocyte cell adhesion molecule                              | 4.9E-02        | -16.0                             | 201952_at        |
| AKT3        | v-akt murine thymoma viral oncogene homolog 3 (protein kinase B, gamma) | 3.1E-02        | -15.3                             | 212607_at        |
| -           | -                                                                       | 6.2E-03        | -14.1                             | 214078_at        |
| TRPC3       | transient receptor potential cation channel, subfamily C, member 3      | 2.2E-02        | -13.6                             | 206425_s_at      |
| AHNAK2      | AHNAK nucleoprotein 2                                                   | 4.7E-02        | -12.8                             | 212992_at        |
| PAK3        | p21 protein (Cdc42/Rac)-activated kinase 3                              | 3.6E-03        | -12.5                             | 214607_at        |
| REEP1       | receptor accessory protein 1                                            | 1.8E-02        | -12.3                             | 204364_s_at      |
| LPHN3       | latrophilin 3                                                           | 2.1E-02        | -12.1                             | 209867_s_at      |
| TRPC3       | transient receptor potential cation channel, subfamily C, member 3      | 2.4E-02        | -12.0                             | 210814_at        |
| IFI44L      | interferon-induced protein 44-like                                      | 4.5E-02        | -12.0                             | 204439_at        |

|         |                                                                        |         |       |             |
|---------|------------------------------------------------------------------------|---------|-------|-------------|
| KCND2   | potassium voltage-gated channel, Shal-related subfamily, member 2      | 8.3E-03 | -11.4 | 207103_at   |
| PCSK5   | proprotein convertase subtilisin/kexin type 5                          | 5.2E-03 | -11.4 | 205559_s_at |
| LTBP1   | latent transforming growth factor beta binding protein 1               | 1.9E-02 | -11.2 | 202729_s_at |
| TNN     | tenascin N                                                             | 3.7E-02 | -10.5 | 215271_at   |
| HTRA1   | HtrA serine peptidase 1                                                | 2.9E-02 | -10.2 | 201185_at   |
| LTBP1   | latent transforming growth factor beta binding protein 1               | 1.3E-02 | -9.9  | 202728_s_at |
| BAI3    | brain-specific angiogenesis inhibitor 3                                | 3.6E-03 | -9.8  | 205638_at   |
| SYT11   | synaptotagmin XI                                                       | 3.3E-02 | -9.5  | 209198_s_at |
| REEP1   | receptor accessory protein 1                                           | 1.8E-02 | -9.5  | 204365_s_at |
| JAM2    | junctional adhesion molecule 2                                         | 2.3E-02 | -8.7  | 219213_at   |
| TACC2   | transforming, acidic coiled-coil containing protein 2                  | 4.0E-02 | -8.2  | 202289_s_at |
| SYT11   | synaptotagmin XI                                                       | 4.3E-02 | -8.2  | 209197_at   |
| GULP1   | GULP, engulfment adaptor PTB domain containing 1                       | 1.2E-02 | -8.2  | 215913_s_at |
| ATP10A  | ATPase, class V, type 10A                                              | 1.7E-02 | -8.2  | 214255_at   |
| CPE     | carboxypeptidase E                                                     | 1.3E-02 | -8.1  | 201116_s_at |
| NAV3    | neuron navigator 3                                                     | 2.9E-02 | -8.0  | 204823_at   |
| MCF2    | MCF.2 cell line derived transforming sequence                          | 1.2E-02 | -8.0  | 208017_s_at |
| PLXNA2  | plexin A2                                                              | 1.5E-02 | -7.4  | 207290_at   |
| ATP2A3  | ATPase, Ca <sup>++</sup> transporting, ubiquitous                      | 2.0E-02 | -7.3  | 207522_s_at |
| SDCCAG8 | serologically defined colon cancer antigen 8                           | 4.7E-02 | -7.2  | 212609_s_at |
| KHDRBS3 | KH domain containing, RNA binding, signal transduction associated 3    | 6.0E-03 | -7.1  | 209781_s_at |
| CHGB    | chromogranin B (secretogranin 1)                                       | 4.0E-02 | -7.1  | 204260_at   |
| ATP2A3  | ATPase, Ca <sup>++</sup> transporting, ubiquitous                      | 2.1E-02 | -6.8  | 213036_x_at |
| CALY    | calcyon neuron-specific vesicular protein                              | 1.3E-02 | -6.8  | 219896_at   |
| ENPP4   | ectonucleotide pyrophosphatase/phosphodiesterase 4 (putative function) | 2.1E-02 | -6.7  | 204161_s_at |
| NR3C2   | nuclear receptor subfamily 3, group C, member 2                        | 2.9E-02 | -6.6  | 205259_at   |
| FAM198B | family with sequence similarity 198, member B                          | 1.3E-02 | -6.3  | 219872_at   |
| NAP1L3  | nucleosome assembly protein 1-like 3                                   | 3.9E-02 | -6.2  | 204749_at   |
| CPE     | carboxypeptidase E                                                     | 3.5E-02 | -6.2  | 201117_s_at |
| ENPP4   | ectonucleotide pyrophosphatase/phosphodiesterase 4 (putative function) | 2.9E-02 | -6.1  | 204160_s_at |

|          |                                                                                                |         |      |             |
|----------|------------------------------------------------------------------------------------------------|---------|------|-------------|
| FAM105A  | family with sequence similarity 105, member A                                                  | 1.6E-02 | -6.1 | 219694_at   |
| MFAP3L   | microfibrillar-associated protein 3-like                                                       | 1.8E-02 | -6.1 | 205442_at   |
| TLR3     | toll-like receptor 3                                                                           | 2.7E-02 | -5.8 | 206271_at   |
| PLXNA2   | plexin A2                                                                                      | 1.5E-02 | -5.8 | 213030_s_at |
| MLLT3    | myeloid/lymphoid or mixed-lineage leukemia (trithorax homolog, Drosophila); translocated to, 3 | 2.2E-02 | -5.5 | 204917_s_at |
| NAP1L2   | nucleosome assembly protein 1-like 2                                                           | 2.0E-02 | -5.3 | 219368_at   |
| PCSK5    | proprotein convertase subtilisin/kexin type 5                                                  | 1.5E-02 | -5.1 | 213652_at   |
| PCSK5    | proprotein convertase subtilisin/kexin type 5                                                  | 1.7E-02 | -5.1 | 205560_at   |
| MLLT3    | myeloid/lymphoid or mixed-lineage leukemia (trithorax homolog, Drosophila); translocated to, 3 | 4.1E-02 | -4.9 | 204918_s_at |
| CADPS2   | Ca <sup>++</sup> -dependent secretion activator 2                                              | 3.1E-02 | -4.9 | 219572_at   |
| LRRC16A  | leucine rich repeat containing 16A                                                             | 4.0E-02 | -4.8 | 219573_at   |
| PION     | pigeon homolog (Drosophila)                                                                    | 1.7E-02 | -4.7 | 222150_s_at |
| CSPG4    | chondroitin sulfate proteoglycan 4                                                             | 2.8E-02 | -4.7 | 204736_s_at |
| N4BP2L2  | NEDD4 binding protein 2-like 2                                                                 | 2.6E-02 | -4.6 | 214748_at   |
| DOCK3    | dedicator of cytokinesis 3                                                                     | 4.2E-02 | -4.5 | 213482_at   |
| HSPA12A  | heat shock 70kDa protein 12A                                                                   | 2.2E-02 | -4.5 | 214434_at   |
| IGFBP4   | insulin-like growth factor binding protein 4                                                   | 2.2E-02 | -4.5 | 201508_at   |
| LPAR4    | lysophosphatidic acid receptor 4                                                               | 2.4E-02 | -4.4 | 206960_at   |
| TBC1D8B  | TBC1 domain family, member 8B (with GRAM domain)                                               | 6.0E-03 | -4.4 | 219771_at   |
| PION     | pigeon homolog (Drosophila)                                                                    | 1.8E-02 | -4.3 | 213142_x_at |
| MCF2     | MCF.2 cell line derived transforming sequence                                                  | 1.3E-02 | -4.3 | 217004_s_at |
| NR2F2    | nuclear receptor subfamily 2, group F, member 2                                                | 4.9E-02 | -4.3 | 209121_x_at |
| SYNE1    | spectrin repeat containing, nuclear envelope 1                                                 | 3.6E-03 | -4.2 | 209447_at   |
| MYO1D    | myosin ID                                                                                      | 2.7E-02 | -4.2 | 212338_at   |
| -        | -                                                                                              | 3.5E-02 | -4.2 | 211568_at   |
| PRKAG2   | protein kinase, AMP-activated, gamma 2 non-catalytic subunit                                   | 9.1E-03 | -4.1 | 218292_s_at |
| ANK2     | ankyrin 2, neuronal                                                                            | 1.7E-02 | -4.0 | 202920_at   |
| TLE2     | transducin-like enhancer of split 2 (E(sp1) homolog, Drosophila)                               | 4.4E-02 | -4.0 | 40837_at    |
| ADAMTSL2 | ADAMTS-like 2                                                                                  | 4.7E-03 | -4.0 | 206629_at   |
| PLEKHA5  | pleckstrin homology domain containing, family A member 5                                       | 2.7E-02 | -4.0 | 220952_s_at |
| GSN      | gelsolin (amyloidosis, Finnish type)                                                           | 3.1E-02 | -4.0 | 200696_s_at |

|          |                                                                |         |      |             |
|----------|----------------------------------------------------------------|---------|------|-------------|
| VWA5A    | von Willebrand factor A domain containing 5A                   | 7.1E-03 | -3.9 | 205011_at   |
| CD82     | CD82 molecule                                                  | 2.1E-02 | -3.9 | 203904_x_at |
| HOXA2    | homeobox A2                                                    | 2.7E-02 | -3.9 | 214457_at   |
| ATP2A3   | ATPase, Ca <sup>++</sup> transporting, ubiquitous              | 2.0E-02 | -3.8 | 213042_s_at |
| CTNNA3   | catenin (cadherin-associated protein), alpha 3                 | 2.8E-02 | -3.8 | 220815_at   |
| CDR2L    | cerebellar degeneration-related protein 2-like                 | 2.1E-02 | -3.8 | 213230_at   |
| IFIH1    | interferon induced with helicase C domain 1                    | 6.2E-03 | -3.8 | 219209_at   |
| PROS1    | protein S (alpha)                                              | 2.1E-02 | -3.7 | 207808_s_at |
| DDX58    | DEAD (Asp-Glu-Ala-Asp) box polypeptide 58                      | 1.9E-02 | -3.7 | 218943_s_at |
| LRRK1    | leucine-rich repeat kinase 1                                   | 1.7E-02 | -3.7 | 219441_s_at |
| C1S      | complement component 1, s subcomponent                         | 1.5E-02 | -3.7 | 208747_s_at |
| GBP2     | guanylate binding protein 2, interferon-inducible              | 1.9E-02 | -3.6 | 202748_at   |
| C1R      | complement component 1, r subcomponent                         | 1.5E-02 | -3.6 | 212067_s_at |
| TNS1     | tensin 1                                                       | 9.0E-03 | -3.6 | 221748_s_at |
| CFHR2    | complement factor H-related 2                                  | 1.3E-02 | -3.6 | 206910_x_at |
| CBX7     | chromobox homolog 7                                            | 1.1E-02 | -3.5 | 212914_at   |
| AKAP13   | A kinase (PRKA) anchor protein 13                              | 2.1E-02 | -3.5 | 208325_s_at |
| RABGAP1L | RAB GTPase activating protein 1-like                           | 4.9E-02 | -3.5 | 213982_s_at |
| GFPT2    | glutamine-fructose-6-phosphate transaminase 2                  | 4.3E-02 | -3.5 | 205100_at   |
| ZNF280D  | zinc finger protein 280D                                       | 1.5E-02 | -3.4 | 221213_s_at |
| PKD1     | polycystic kidney disease 1 (autosomal dominant)               | 2.1E-02 | -3.4 | 202328_s_at |
| GSTM5    | glutathione S-transferase mu 5                                 | 4.4E-02 | -3.4 | 205752_s_at |
| NCS1     | neuronal calcium sensor 1                                      | 3.6E-03 | -3.3 | 218266_s_at |
| FXVD6    | FXVD domain containing ion transport regulator 6               | 2.1E-02 | -3.3 | 217897_at   |
| TPBG     | trophoblast glycoprotein                                       | 1.1E-02 | -3.3 | 203476_at   |
| CCPG1    | cell cycle progression 1                                       | 1.3E-02 | -3.3 | 222156_x_at |
| CCPG1    | cell cycle progression 1                                       | 1.8E-02 | -3.3 | 214151_s_at |
| HIVP2    | human immunodeficiency virus type I enhancer binding protein 2 | 3.4E-02 | -3.2 | 212641_at   |
| KIAA1109 | KIAA1109                                                       | 1.2E-02 | -3.2 | 212779_at   |
| NYNRIN   | NYN domain and retroviral integrase containing                 | 4.7E-02 | -3.2 | 220911_s_at |
| APOL1    | apolipoprotein L, 1                                            | 4.0E-02 | -3.1 | 209546_s_at |
| CCPG1    | cell cycle progression 1                                       | 2.1E-02 | -3.1 | 214152_at   |
| AKAP13   | A kinase (PRKA) anchor protein 13                              | 4.1E-02 | -3.1 | 221718_s_at |

|         |                                                                                                   |         |      |             |
|---------|---------------------------------------------------------------------------------------------------|---------|------|-------------|
| PAM     | peptidylglycine alpha-amidating monooxygenase                                                     | 2.7E-02 | -3.1 | 214620_x_at |
| PAM     | peptidylglycine alpha-amidating monooxygenase                                                     | 2.1E-02 | -3.0 | 202336_s_at |
| TESK2   | testis-specific kinase 2                                                                          | 3.1E-02 | -3.0 | 205486_at   |
| AKAP13  | A kinase (PRKA) anchor protein 13                                                                 | 3.5E-02 | -3.0 | 222024_s_at |
| CPT1A   | carnitine palmitoyltransferase 1A (liver)                                                         | 1.8E-02 | -3.0 | 203633_at   |
| CCPG1   | cell cycle progression 1                                                                          | 1.6E-02 | -3.0 | 221511_x_at |
| HIVEP2  | human immunodeficiency virus type I enhancer binding protein 2                                    | 3.3E-02 | -3.0 | 212642_s_at |
| CDADC1  | cytidine and dCMP deaminase domain containing 1                                                   | 1.3E-02 | -3.0 | 221015_s_at |
| TRIM22  | tripartite motif-containing 22                                                                    | 4.9E-02 | -2.9 | 213293_s_at |
| GNB5    | guanine nucleotide binding protein (G protein), beta 5                                            | 3.3E-02 | -2.9 | 204000_at   |
| PBXIP1  | pre-B-cell leukemia homeobox interacting protein 1                                                | 4.9E-03 | -2.9 | 214177_s_at |
| PAM     | peptidylglycine alpha-amidating monooxygenase                                                     | 2.2E-02 | -2.8 | 212958_x_at |
| CPEB3   | cytoplasmic polyadenylation element binding protein 3                                             | 3.8E-02 | -2.8 | 205773_at   |
| SYNM    | synemin, intermediate filament protein                                                            | 3.8E-02 | -2.8 | 212730_at   |
| FGF2    | fibroblast growth factor 2 (basic)                                                                | 4.1E-02 | -2.8 | 204421_s_at |
| LPHN1   | latrophilin 1                                                                                     | 1.5E-02 | -2.7 | 47560_at    |
| ARL6IP5 | ADP-ribosylation-like factor 6 interacting protein 5                                              | 3.9E-03 | -2.7 | 200761_s_at |
| TNS1    | tensin 1                                                                                          | 4.4E-03 | -2.7 | 218864_at   |
| -       | -                                                                                                 | 2.5E-02 | -2.7 | 222111_at   |
| TNS1    | tensin 1                                                                                          | 1.0E-02 | -2.7 | 221747_at   |
| JAM3    | junctional adhesion molecule 3                                                                    | 3.9E-02 | -2.7 | 212813_at   |
| PBXIP1  | pre-B-cell leukemia homeobox interacting protein 1                                                | 7.2E-03 | -2.7 | 212259_s_at |
| SIK3    | SIK family kinase 3                                                                               | 1.0E-02 | -2.6 | 204157_s_at |
| ZBTB38  | zinc finger and BTB domain containing 38                                                          | 2.1E-02 | -2.6 | 219221_at   |
| UNC13B  | unc-13 homolog B (C. elegans)                                                                     | 3.7E-02 | -2.6 | 202893_at   |
| VAMP1   | vesicle-associated membrane protein 1 (synaptobrevin 1)                                           | 4.7E-02 | -2.6 | 213326_at   |
| C2orf67 | chromosome 2 open reading frame 67                                                                | 2.9E-02 | -2.6 | 215046_at   |
| THRA    | thyroid hormone receptor, alpha (erythroblastic leukemia viral (v-erb-a) oncogene homolog, avian) | 1.3E-02 | -2.6 | 35846_at    |
| CALM1   | calmodulin 1 (phosphorylase kinase, delta)                                                        | 3.1E-02 | -2.6 | 211985_s_at |
| ZMIZ1   | zinc finger, MIZ-type containing 1                                                                | 1.6E-02 | -2.6 | 212124_at   |

|           |                                                                                                   |         |      |             |
|-----------|---------------------------------------------------------------------------------------------------|---------|------|-------------|
| FAM63B    | family with sequence similarity 63, member B                                                      | 1.5E-02 | -2.5 | 214691_x_at |
| ERMAP     | erythroblast membrane-associated protein (Scianna blood group)                                    | 2.0E-02 | -2.5 | 219905_at   |
| CALM1     | calmodulin 1 (phosphorylase kinase, delta)                                                        | 3.3E-02 | -2.5 | 211984_at   |
| THRA      | thyroid hormone receptor, alpha (erythroblastic leukemia viral (v-erb-a) oncogene homolog, avian) | 4.7E-03 | -2.5 | 204100_at   |
| LMBRD1    | LMBR1 domain containing 1                                                                         | 2.8E-02 | -2.5 | 218191_s_at |
| C9orf9    | chromosome 9 open reading frame 9                                                                 | 1.5E-02 | -2.5 | 220050_at   |
| BDH2      | 3-hydroxybutyrate dehydrogenase, type 2                                                           | 1.7E-02 | -2.5 | 218285_s_at |
| PBXIP1    | pre-B-cell leukemia homeobox interacting protein 1                                                | 8.3E-03 | -2.5 | 207838_x_at |
| GABARAPL1 | GABA(A) receptor-associated protein like 1                                                        | 2.4E-02 | -2.5 | 208869_s_at |
| TTBK2     | tau tubulin kinase 2                                                                              | 1.3E-02 | -2.5 | 213922_at   |
| ARL6IP5   | ADP-ribosylation-like factor 6 interacting protein 5                                              | 4.7E-03 | -2.4 | 200760_s_at |
| JAK2      | Janus kinase 2                                                                                    | 1.3E-02 | -2.4 | 205842_s_at |
| GABARAPL1 | GABA(A) receptor-associated protein like 1                                                        | 1.0E-02 | -2.4 | 211458_s_at |
| HEXIM1    | hexamethylene bis-acetamide inducible 1                                                           | 1.5E-02 | -2.4 | 202815_s_at |
| ARHGEF9   | Cdc42 guanine nucleotide exchange factor (GEF) 9                                                  | 2.6E-02 | -2.4 | 203263_s_at |
| SASH1     | SAM and SH3 domain containing 1                                                                   | 2.0E-02 | -2.4 | 41644_at    |
| SASH1     | SAM and SH3 domain containing 1                                                                   | 1.3E-02 | -2.4 | 213236_at   |
| STOML1    | stomatin (EPB72)-like 1                                                                           | 1.2E-02 | -2.4 | 33736_at    |
| SMARCA2   | SWI/SNF related, matrix associated, actin dependent regulator of chromatin, subfamily a, member 2 | 1.5E-02 | -2.4 | 206544_x_at |
| WDR7      | WD repeat domain 7                                                                                | 5.3E-03 | -2.4 | 212880_at   |
| AES       | amino-terminal enhancer of split                                                                  | 2.0E-02 | -2.4 | 217729_s_at |
| CLN5      | ceroid-lipofuscinosis, neuronal 5                                                                 | 2.6E-02 | -2.4 | 204085_s_at |
| DENND4C   | DENN/MADD domain containing 4C                                                                    | 1.8E-03 | -2.4 | 205684_s_at |
| ZHX3      | zinc fingers and homeoboxes 3                                                                     | 4.2E-02 | -2.4 | 217367_s_at |
| CREM      | cAMP responsive element modulator                                                                 | 4.1E-02 | -2.4 | 209967_s_at |
| ZEB1      | zinc finger E-box binding homeobox 1                                                              | 1.9E-02 | -2.3 | 212758_s_at |
| PTPN12    | protein tyrosine phosphatase, non-receptor type 12                                                | 1.3E-02 | -2.3 | 202006_at   |
| MYO5A     | myosin VA (heavy chain 12, myosin)                                                                | 2.9E-02 | -2.3 | 204527_at   |
| AKAP13    | A kinase (PRKA) anchor protein 13                                                                 | 4.0E-02 | -2.3 | 209534_x_at |
| VPS13C    | vacuolar protein sorting 13 homolog C ( <i>S. cerevisiae</i> )                                    | 2.8E-02 | -2.3 | 218396_at   |
| MID2      | midline 2                                                                                         | 3.3E-02 | -2.3 | 208384_s_at |

|                                                                    |                                                                                                                                                                                                                                                                                            |         |      |             |
|--------------------------------------------------------------------|--------------------------------------------------------------------------------------------------------------------------------------------------------------------------------------------------------------------------------------------------------------------------------------------|---------|------|-------------|
| BCL2L2                                                             | BCL2-like 2                                                                                                                                                                                                                                                                                | 2.2E-02 | -2.3 | 209311_at   |
| APOL6                                                              | apolipoprotein L, 6                                                                                                                                                                                                                                                                        | 4.8E-02 | -2.3 | 219716_at   |
| C17orf108                                                          | chromosome 17 open reading frame 108                                                                                                                                                                                                                                                       | 3.3E-02 | -2.3 | 213195_at   |
| FYCO1                                                              | FYVE and coiled-coil domain containing 1                                                                                                                                                                                                                                                   | 1.8E-02 | -2.3 | 218204_s_at |
| ZEB1                                                               | zinc finger E-box binding homeobox 1                                                                                                                                                                                                                                                       | 2.2E-02 | -2.2 | 210875_s_at |
| CALM3                                                              | calmodulin 3 (phosphorylase kinase, delta)                                                                                                                                                                                                                                                 | 1.2E-02 | -2.2 | 200622_x_at |
| RAB8B                                                              | RAB8B, member RAS oncogene family                                                                                                                                                                                                                                                          | 4.2E-03 | -2.2 | 219210_s_at |
| MAP3K13                                                            | mitogen-activated protein kinase kinase kinase 13                                                                                                                                                                                                                                          | 1.5E-02 | -2.2 | 206249_at   |
| HAAO                                                               | 3-hydroxyanthranilate 3,4-dioxygenase                                                                                                                                                                                                                                                      | 1.1E-02 | -2.2 | 205657_at   |
| BAT2L1                                                             | HLA-B associated transcript 2-like 1                                                                                                                                                                                                                                                       | 4.0E-02 | -2.2 | 212068_s_at |
| INPP5A                                                             | inositol polyphosphate-5-phosphatase, 40kDa                                                                                                                                                                                                                                                | 8.4E-03 | -2.2 | 203006_at   |
| -                                                                  | -                                                                                                                                                                                                                                                                                          | 1.9E-02 | -2.2 | 214808_at   |
| TIMP2                                                              | TIMP metalloproteinase inhibitor 2                                                                                                                                                                                                                                                         | 3.2E-02 | -2.2 | 203167_at   |
| TLE1                                                               | transducin-like enhancer of split 1 (E(sp1) homolog, Drosophila)                                                                                                                                                                                                                           | 4.5E-02 | -2.2 | 203221_at   |
| MLXIP                                                              | MLX interacting protein                                                                                                                                                                                                                                                                    | 3.6E-02 | -2.2 | 202519_at   |
| SMARCA2                                                            | SWI/SNF related, matrix associated, actin dependent regulator of chromatin, subfamily a, member 2                                                                                                                                                                                          | 1.1E-02 | -2.2 | 206542_s_at |
| TENC1                                                              | tensin like C1 domain containing phosphatase (tensin 2)                                                                                                                                                                                                                                    | 3.8E-02 | -2.2 | 212494_at   |
| SH3BGRL                                                            | SH3 domain binding glutamic acid-rich protein like                                                                                                                                                                                                                                         | 2.4E-02 | -2.2 | 201311_s_at |
| TLN1                                                               | talin 1                                                                                                                                                                                                                                                                                    | 7.2E-03 | -2.2 | 203254_s_at |
| GOLGA2                                                             | golgin A2                                                                                                                                                                                                                                                                                  | 8.0E-03 | -2.1 | 35436_at    |
| DMXL2                                                              | Dmx-like 2                                                                                                                                                                                                                                                                                 | 4.3E-02 | -2.1 | 212820_at   |
| KIAA1109                                                           | KIAA1109                                                                                                                                                                                                                                                                                   | 3.4E-02 | -2.1 | 214929_s_at |
| MAN1A2                                                             | mannosidase, alpha, class 1A, member 2                                                                                                                                                                                                                                                     | 3.9E-02 | -2.1 | 217920_at   |
| DTWD1                                                              | DTW domain containing 1                                                                                                                                                                                                                                                                    | 4.1E-02 | -2.1 | 219291_at   |
| PCDHGC3;PCDHGA10;PCDHGA11;PCDHGA2;PCDHGA3;PCDHGA7;PCDHGB7;PCDHGA8; | protocadherin gamma subfamily C, 3;protocadherin gamma subfamily A, 10;protocadherin gamma subfamily A, 11;protocadherin gamma subfamily A, 2;protocadherin gamma subfamily A, 3;protocadherin gamma subfamily A, 7;protocadherin gamma subfamily B, 7;protocadherin gamma subfamily A, 8; | 5.3E-03 | -2.1 | 209079_x_at |
| CHN1                                                               | chimerin (chimaerin) 1                                                                                                                                                                                                                                                                     | 3.7E-02 | -2.1 | 212624_s_at |
| CLN5                                                               | ceroid-lipofuscinosis, neuronal 5                                                                                                                                                                                                                                                          | 1.7E-02 | -2.1 | 204084_s_at |

|                                                                    |                                                                                                                                                                                                                                                                                            |         |      |             |
|--------------------------------------------------------------------|--------------------------------------------------------------------------------------------------------------------------------------------------------------------------------------------------------------------------------------------------------------------------------------------|---------|------|-------------|
| -                                                                  | -                                                                                                                                                                                                                                                                                          | 2.8E-02 | -2.1 | 215185_at   |
| FYN                                                                | FYN oncogene related to SRC, FGR, YES                                                                                                                                                                                                                                                      | 4.4E-02 | -2.1 | 210105_s_at |
| OAZ2                                                               | ornithine decarboxylase antizyme 2                                                                                                                                                                                                                                                         | 1.5E-02 | -2.1 | 201365_at   |
| IRF9                                                               | interferon regulatory factor 9                                                                                                                                                                                                                                                             | 4.7E-02 | -2.1 | 203882_at   |
| GLT8D2                                                             | glycosyltransferase 8 domain containing 2                                                                                                                                                                                                                                                  | 3.9E-02 | -2.1 | 221447_s_at |
| PCDHGC3;PCDHGA10;PCDHGA11;PCDHGA2;PCDHGA3;PCDHGA7;PCDHGB7;PCDHGA8; | protocadherin gamma subfamily C, 3;protocadherin gamma subfamily A, 10;protocadherin gamma subfamily A, 11;protocadherin gamma subfamily A, 2;protocadherin gamma subfamily A, 3;protocadherin gamma subfamily A, 7;protocadherin gamma subfamily B, 7;protocadherin gamma subfamily A, 8; | 4.7E-03 | -2.1 | 215836_s_at |
| MCF2                                                               | MCF.2 cell line derived transforming sequence                                                                                                                                                                                                                                              | 9.0E-03 | -2.1 | 214884_at   |
| BAT2L1                                                             | HLA-B associated transcript 2-like 1                                                                                                                                                                                                                                                       | 3.5E-02 | -2.1 | 212069_s_at |
| SETX                                                               | senataxin                                                                                                                                                                                                                                                                                  | 4.7E-03 | -2.1 | 201964_at   |
| PCDHGC3;PCDHGA10;PCDHGA11;PCDHGA2;PCDHGA3;PCDHGA7;PCDHGB7;PCDHGA8; | protocadherin gamma subfamily C, 3;protocadherin gamma subfamily A, 10;protocadherin gamma subfamily A, 11;protocadherin gamma subfamily A, 2;protocadherin gamma subfamily A, 3;protocadherin gamma subfamily A, 7;protocadherin gamma subfamily B, 7;protocadherin gamma subfamily A, 8; | 7.3E-03 | -2.1 | 205717_x_at |
| WDFY3                                                              | WD repeat and FYVE domain containing 3                                                                                                                                                                                                                                                     | 1.7E-02 | -2.1 | 212598_at   |
| LPHN1                                                              | latrophilin 1                                                                                                                                                                                                                                                                              | 2.0E-02 | -2.0 | 203488_at   |
| ZEB1                                                               | zinc finger E-box binding homeobox 1                                                                                                                                                                                                                                                       | 1.5E-02 | -2.0 | 212764_at   |
| FBXO28                                                             | F-box protein 28                                                                                                                                                                                                                                                                           | 4.2E-02 | -2.0 | 202271_at   |
| -                                                                  | -                                                                                                                                                                                                                                                                                          | 2.5E-02 | -2.0 | 213156_at   |
| SMARCA2                                                            | SWI/SNF related, matrix associated, actin dependent regulator of chromatin, subfamily a, member 2                                                                                                                                                                                          | 2.9E-02 | -2.0 | 212257_s_at |
| GOLGA2                                                             | golgin A2                                                                                                                                                                                                                                                                                  | 2.2E-02 | -2.0 | 204384_at   |
| MPDZ                                                               | multiple PDZ domain protein                                                                                                                                                                                                                                                                | 2.5E-02 | -2.0 | 205079_s_at |
| CAB39L                                                             | calcium binding protein 39-like                                                                                                                                                                                                                                                            | 4.2E-02 | -2.0 | 221003_s_at |



|                                                                    |                                                                                                                                                                                                                                                                                            |         |      |             |
|--------------------------------------------------------------------|--------------------------------------------------------------------------------------------------------------------------------------------------------------------------------------------------------------------------------------------------------------------------------------------|---------|------|-------------|
| PCDHGC3;PCDHGA10;PCDHGA11;PCDHGA2;PCDHGA3;PCDHGA7;PCDHGB7;PCDHGA8; | protocadherin gamma subfamily C, 3;protocadherin gamma subfamily A, 10;protocadherin gamma subfamily A, 11;protocadherin gamma subfamily A, 2;protocadherin gamma subfamily A, 3;protocadherin gamma subfamily A, 7;protocadherin gamma subfamily B, 7;protocadherin gamma subfamily A, 8; | 8.4E-03 | -2.0 | 211066_x_at |
| MPDZ                                                               | multiple PDZ domain protein                                                                                                                                                                                                                                                                | 1.5E-02 | -2.0 | 213306_at   |
| LY86                                                               | lymphocyte antigen 86                                                                                                                                                                                                                                                                      | 2.1E-02 | 2.0  | 205859_at   |
| SMARCC1                                                            | SWI/SNF related, matrix associated, actin dependent regulator of chromatin, subfamily c, member 1                                                                                                                                                                                          | 2.2E-02 | 2.0  | 201075_s_at |
| MTFR1                                                              | mitochondrial fission regulator 1                                                                                                                                                                                                                                                          | 2.3E-02 | 2.0  | 203207_s_at |
| PHB                                                                | prohibitin                                                                                                                                                                                                                                                                                 | 1.6E-02 | 2.0  | 200658_s_at |
| FEN1                                                               | flap structure-specific endonuclease 1                                                                                                                                                                                                                                                     | 2.7E-02 | 2.0  | 204767_s_at |
| AP1G2                                                              | adaptor-related protein complex 1, gamma 2 subunit                                                                                                                                                                                                                                         | 4.6E-02 | 2.0  | 201613_s_at |
| NAP1L1                                                             | nucleosome assembly protein 1-like 1                                                                                                                                                                                                                                                       | 2.7E-02 | 2.0  | 208753_s_at |
| TBCE                                                               | tubulin folding cofactor E                                                                                                                                                                                                                                                                 | 4.7E-03 | 2.0  | 203714_s_at |
| MTERFD1                                                            | MTERF domain containing 1                                                                                                                                                                                                                                                                  | 1.3E-02 | 2.0  | 219363_s_at |
| LSM2                                                               | LSM2 homolog, U6 small nuclear RNA associated ( <i>S. cerevisiae</i> )                                                                                                                                                                                                                     | 4.5E-02 | 2.0  | 209449_at   |
| CBX3                                                               | chromobox homolog 3 (HP1 gamma homolog, <i>Drosophila</i> )                                                                                                                                                                                                                                | 1.7E-02 | 2.0  | 201091_s_at |
| DECR2                                                              | 2,4-dienoyl CoA reductase 2, peroxisomal                                                                                                                                                                                                                                                   | 2.2E-02 | 2.0  | 219664_s_at |
| GMDS                                                               | GDP-mannose 4,6-dehydratase                                                                                                                                                                                                                                                                | 1.0E-02 | 2.1  | 214106_s_at |
| SLC11A2                                                            | solute carrier family 11 (proton-coupled divalent metal ion transporters), member 2                                                                                                                                                                                                        | 4.8E-02 | 2.1  | 203124_s_at |
| FAM36A                                                             | family with sequence similarity 36, member A                                                                                                                                                                                                                                               | 3.5E-02 | 2.1  | 206848_at   |
| SRPK1                                                              | SFRS protein kinase 1                                                                                                                                                                                                                                                                      | 1.8E-02 | 2.1  | 202200_s_at |
| STAG3                                                              | stromal antigen 3                                                                                                                                                                                                                                                                          | 4.2E-02 | 2.1  | 219753_at   |
| MTFR1                                                              | mitochondrial fission regulator 1                                                                                                                                                                                                                                                          | 1.1E-02 | 2.1  | 203208_s_at |
| CENPA                                                              | centromere protein A                                                                                                                                                                                                                                                                       | 1.9E-02 | 2.1  | 210821_x_at |
| RAMP2                                                              | receptor (G protein-coupled) activity modifying protein 2                                                                                                                                                                                                                                  | 1.7E-02 | 2.1  | 205779_at   |
| CSE1L                                                              | CSE1 chromosome segregation 1-like (yeast)                                                                                                                                                                                                                                                 | 1.8E-02 | 2.1  | 201111_at   |
| DALRD3                                                             | DALR anticodon binding domain containing 3                                                                                                                                                                                                                                                 | 3.9E-02 | 2.1  | 221934_s_at |
| NAP1L1                                                             | nucleosome assembly protein 1-like 1                                                                                                                                                                                                                                                       | 2.3E-02 | 2.1  | 208754_s_at |
| POLD1                                                              | polymerase (DNA directed), delta 1, catalytic subunit 125kDa                                                                                                                                                                                                                               | 8.4E-03 | 2.1  | 203422_at   |

|          |                                                                     |         |     |             |
|----------|---------------------------------------------------------------------|---------|-----|-------------|
| DDX39    | DEAD (Asp-Glu-Ala-Asp) box polypeptide 39                           | 1.1E-02 | 2.2 | 201584_s_at |
| RRS1     | RRS1 ribosome biogenesis regulator homolog ( <i>S. cerevisiae</i> ) | 2.7E-02 | 2.2 | 209567_at   |
| SLC25A13 | solute carrier family 25, member 13 (citrin)                        | 1.3E-02 | 2.2 | 203775_at   |
| SCARB1   | scavenger receptor class B, member 1                                | 4.3E-02 | 2.2 | 201819_at   |
| HSPD1    | heat shock 60kDa protein 1 (chaperonin)                             | 1.5E-02 | 2.2 | 200806_s_at |
| GTSE1    | G-2 and S-phase expressed 1                                         | 3.9E-02 | 2.2 | 215942_s_at |
| EBP      | emopamil binding protein (sterol isomerase)                         | 1.3E-02 | 2.2 | 202735_at   |
| CPSF1    | cleavage and polyadenylation specific factor 1, 160kDa              | 4.8E-02 | 2.2 | 201639_s_at |
| EIF2S2   | eukaryotic translation initiation factor 2, subunit 2 beta, 38kDa   | 1.5E-02 | 2.2 | 208725_at   |
| HN1L     | hematological and neurological expressed 1-like                     | 2.7E-02 | 2.2 | 212115_at   |
| PRIM2    | primase, DNA, polypeptide 2 (58kDa)                                 | 2.1E-02 | 2.2 | 205628_at   |
| POLD2    | polymerase (DNA directed), delta 2, regulatory subunit 50kDa        | 1.3E-02 | 2.2 | 201115_at   |
| EIF3H    | eukaryotic translation initiation factor 3, subunit H               | 6.0E-03 | 2.2 | 201592_at   |
| DBF4     | DBF4 homolog ( <i>S. cerevisiae</i> )                               | 1.3E-02 | 2.2 | 204244_s_at |
| AZIN1    | antizyme inhibitor 1                                                | 3.3E-02 | 2.2 | 201772_at   |
| EBP      | emopamil binding protein (sterol isomerase)                         | 2.5E-02 | 2.2 | 213787_s_at |
| CYC1     | cytochrome c-1                                                      | 1.3E-02 | 2.2 | 201066_at   |
| DUS4L    | dihydrouridine synthase 4-like ( <i>S. cerevisiae</i> )             | 2.9E-02 | 2.3 | 205761_s_at |
| MKI67    | antigen identified by monoclonal antibody Ki-67                     | 1.9E-02 | 2.3 | 212021_s_at |
| CPSF1    | cleavage and polyadenylation specific factor 1, 160kDa              | 4.1E-02 | 2.3 | 33132_at    |
| DARS2    | aspartyl-tRNA synthetase 2, mitochondrial                           | 2.0E-02 | 2.3 | 218365_s_at |
| CDC45L   | CDC45 cell division cycle 45-like ( <i>S. cerevisiae</i> )          | 2.8E-02 | 2.3 | 204126_s_at |
| C19orf54 | chromosome 19 open reading frame 54                                 | 1.8E-02 | 2.3 | 222052_at   |
| SQLE     | squalene epoxidase                                                  | 2.4E-02 | 2.3 | 213577_at   |
| BUB1     | budding uninhibited by benzimidazoles 1 homolog (yeast)             | 7.1E-03 | 2.3 | 215509_s_at |
| C1orf112 | chromosome 1 open reading frame 112                                 | 4.5E-02 | 2.3 | 220840_s_at |
| MCM7     | minichromosome maintenance complex component 7                      | 3.1E-02 | 2.3 | 208795_s_at |

|               |                                                                                                      |         |     |             |
|---------------|------------------------------------------------------------------------------------------------------|---------|-----|-------------|
| TSTA3         | tissue specific transplantation antigen P35B                                                         | 3.6E-02 | 2.3 | 36936_at    |
| AHCY          | adenosylhomocysteinase                                                                               | 9.7E-03 | 2.4 | 200903_s_at |
| PTPRF         | protein tyrosine phosphatase, receptor type, F                                                       | 4.0E-02 | 2.4 | 200635_s_at |
| DCTPP1        | dCTP pyrophosphatase 1                                                                               | 1.3E-02 | 2.4 | 218069_at   |
| SLC5A6        | solute carrier family 5 (sodium-dependent vitamin transporter), member 6                             | 4.9E-02 | 2.4 | 204087_s_at |
| BOLA2;BOLA2B; | bolA homolog 2 (E. coli);bolA homolog 2B (E. coli);                                                  | 2.9E-02 | 2.4 | 209836_x_at |
| RFC4          | replication factor C (activator 1) 4, 37kDa                                                          | 2.1E-02 | 2.4 | 204023_at   |
| SQLE          | squalene epoxidase                                                                                   | 2.9E-02 | 2.4 | 209218_at   |
| MCM7          | minichromosome maintenance complex component 7                                                       | 1.5E-02 | 2.4 | 210983_s_at |
| ACY1          | aminoacylase 1                                                                                       | 3.1E-02 | 2.4 | 202740_at   |
| HSD17B11      | hydroxysteroid (17-beta) dehydrogenase 11                                                            | 1.6E-02 | 2.4 | 217989_at   |
| UBE2S         | ubiquitin-conjugating enzyme E2S                                                                     | 7.8E-03 | 2.4 | 202779_s_at |
| NEK2          | NIMA (never in mitosis gene a)-related kinase 2                                                      | 3.3E-02 | 2.4 | 211080_s_at |
| PAICS         | phosphoribosylaminoimidazole carboxylase, phosphoribosylaminoimidazole succinocarboxamide synthetase | 1.8E-02 | 2.4 | 201014_s_at |
| KIFC1         | kinesin family member C1                                                                             | 1.3E-02 | 2.4 | 209680_s_at |
| ANKRD7        | ankyrin repeat domain 7                                                                              | 2.2E-02 | 2.4 | 206112_at   |
| PCK2          | phosphoenolpyruvate carboxykinase 2 (mitochondrial)                                                  | 3.1E-02 | 2.5 | 202847_at   |
| C6orf26       | chromosome 6 open reading frame 26                                                                   | 3.5E-02 | 2.5 | 212913_at   |
| SLC19A1       | solute carrier family 19 (folate transporter), member 1                                              | 1.4E-02 | 2.5 | 211576_s_at |
| WDR67         | WD repeat domain 67                                                                                  | 3.3E-02 | 2.5 | 214061_at   |
| CKS1B         | CDC28 protein kinase regulatory subunit 1B                                                           | 1.9E-02 | 2.5 | 201897_s_at |
| RBCK1         | RanBP-type and C3HC4-type zinc finger containing 1                                                   | 3.6E-02 | 2.5 | 221827_at   |
| PUS7          | pseudouridylate synthase 7 homolog (S. cerevisiae)                                                   | 2.1E-02 | 2.6 | 218984_at   |
| SHMT2         | serine hydroxymethyltransferase 2 (mitochondrial)                                                    | 1.3E-02 | 2.6 | 214096_s_at |
| SHMT2         | serine hydroxymethyltransferase 2 (mitochondrial)                                                    | 1.7E-02 | 2.6 | 214095_at   |
| PPAT          | phosphoribosyl pyrophosphate amidotransferase                                                        | 2.1E-02 | 2.6 | 209434_s_at |
| CENPN         | centromere protein N                                                                                 | 1.9E-02 | 2.6 | 222118_at   |

|          |                                                                            |         |     |             |
|----------|----------------------------------------------------------------------------|---------|-----|-------------|
| CCDC90A  | coiled-coil domain containing 90A                                          | 2.6E-02 | 2.6 | 220094_s_at |
| TACC3    | transforming, acidic coiled-coil containing protein 3                      | 4.2E-02 | 2.6 | 218308_at   |
| SQLE     | squalene epoxidase                                                         | 1.3E-02 | 2.6 | 213562_s_at |
| NPM1     | nucleophosmin (nucleolar phosphoprotein B23, numatrin)                     | 5.8E-03 | 2.6 | 221923_s_at |
| EIF4EBP1 | eukaryotic translation initiation factor 4E binding protein 1              | 3.3E-02 | 2.7 | 221539_at   |
| PAFAH1B3 | platelet-activating factor acetylhydrolase 1b, catalytic subunit 3 (29kDa) | 4.7E-03 | 2.7 | 203228_at   |
| ESPL1    | extra spindle pole bodies homolog 1 (S. cerevisiae)                        | 2.4E-02 | 2.7 | 204817_at   |
| TIMELESS | timeless homolog (Drosophila)                                              | 3.5E-02 | 2.7 | 203046_s_at |
| PXMP2    | peroxisomal membrane protein 2, 22kDa                                      | 1.3E-02 | 2.7 | 219076_s_at |
| CENPM    | centromere protein M                                                       | 2.7E-02 | 2.7 | 218741_at   |
| ASAP1    | ArfGAP with SH3 domain, ankyrin repeat and PH domain 1                     | 2.1E-02 | 2.8 | 221039_s_at |
| SHMT2    | serine hydroxymethyltransferase 2 (mitochondrial)                          | 1.1E-02 | 2.8 | 214437_s_at |
| CDCA3    | cell division cycle associated 3                                           | 1.1E-02 | 2.8 | 221436_s_at |
| C12orf48 | chromosome 12 open reading frame 48                                        | 3.1E-02 | 2.8 | 220060_s_at |
| GTSE1    | G-2 and S-phase expressed 1                                                | 3.8E-02 | 2.9 | 204315_s_at |
| NMU      | neuromedin U                                                               | 4.0E-02 | 2.9 | 206023_at   |
| CBS      | cystathionine-beta-synthase                                                | 4.0E-02 | 2.9 | 212816_s_at |
| BOLA2    | bolA homolog 2 (E. coli)                                                   | 3.9E-03 | 2.9 | 210396_s_at |
| PTPRF    | protein tyrosine phosphatase, receptor type, F                             | 2.8E-02 | 2.9 | 200636_s_at |
| STK17B   | serine/threonine kinase 17b                                                | 1.2E-02 | 2.9 | 205214_at   |
| CDCA8    | cell division cycle associated 8                                           | 1.1E-02 | 2.9 | 221520_s_at |
| WDYHV1   | WDYHV motif containing 1                                                   | 5.2E-03 | 2.9 | 219060_at   |
| UGT2B28  | UDP glucuronosyltransferase 2 family, polypeptide B28                      | 4.8E-02 | 3.0 | 211682_x_at |
| CHEK1    | CHK1 checkpoint homolog (S. pombe)                                         | 2.8E-02 | 3.0 | 205393_s_at |
| DONSON   | downstream neighbor of SON                                                 | 4.1E-02 | 3.0 | 221677_s_at |
| PRIM1    | primase, DNA, polypeptide 1 (49kDa)                                        | 1.0E-02 | 3.0 | 205053_at   |
| KPNA2    | karyopherin alpha 2 (RAG cohort 1, importin alpha 1)                       | 1.1E-02 | 3.0 | 201088_at   |
| PSRC1    | proline/serine-rich coiled-coil 1                                          | 3.3E-02 | 3.0 | 201896_s_at |
| ARL4A    | ADP-ribosylation factor-like 4A                                            | 4.1E-02 | 3.1 | 205020_s_at |
| GMNN     | geminin, DNA replication inhibitor                                         | 3.9E-02 | 3.1 | 218350_s_at |
| DSCC1    | defective in sister chromatid cohesion 1 homolog (S. cerevisiae)           | 9.4E-03 | 3.1 | 219000_s_at |
| LACTB2   | lactamase, beta 2                                                          | 1.0E-02 | 3.1 | 218701_at   |

|          |                                                      |         |     |             |
|----------|------------------------------------------------------|---------|-----|-------------|
| RNASEH2A | ribonuclease H2, subunit A                           | 3.6E-03 | 3.1 | 203022_at   |
| KPNA2    | karyopherin alpha 2 (RAG cohort 1, importin alpha 1) | 8.4E-03 | 3.2 | 211762_s_at |
| ESPL1    | extra spindle pole bodies homolog 1 (S. cerevisiae)  | 1.2E-02 | 3.2 | 38158_at    |
| C7orf68  | chromosome 7 open reading frame 68                   | 9.0E-03 | 3.3 | 218507_at   |
| RAD51L1  | RAD51-like 1 (S. cerevisiae)                         | 7.3E-03 | 3.3 | 210255_at   |
| MGC87042 | STEAP family protein MGC87042                        | 4.1E-02 | 3.3 | 217553_at   |
| CDC25C   | cell division cycle 25 homolog C (S. pombe)          | 1.5E-02 | 3.4 | 205167_s_at |
| BEAN     | brain expressed, associated with Nedd4               | 2.1E-02 | 3.4 | 214068_at   |
| FAM64A   | family with sequence similarity 64, member A         | 3.9E-03 | 3.5 | 221591_s_at |
| NCAPH    | non-SMC condensin I complex, subunit H               | 5.0E-03 | 3.5 | 212949_at   |
| OPLAH    | 5-oxoprolinase (ATP-hydrolysing)                     | 1.5E-02 | 3.5 | 222025_s_at |
| RPP40    | ribonuclease P/MRP 40kDa subunit                     | 1.3E-02 | 3.6 | 213427_at   |
| EPCAM    | epithelial cell adhesion molecule                    | 5.1E-03 | 3.6 | 201839_s_at |
| HN1      | hematological and neurological expressed 1           | 1.7E-02 | 3.6 | 217755_at   |
| MKI67    | antigen identified by monoclonal antibody Ki-67      | 1.5E-02 | 3.6 | 212023_s_at |
| HJURP    | Holliday junction recognition protein                | 7.3E-03 | 3.6 | 218726_at   |
| CHEK1    | CHK1 checkpoint homolog (S. pombe)                   | 3.7E-02 | 3.6 | 205394_at   |
| NEIL3    | nei endonuclease VIII-like 3 (E. coli)               | 2.1E-02 | 3.7 | 219502_at   |
| TRIB3    | tribbles homolog 3 (Drosophila)                      | 6.3E-03 | 3.7 | 218145_at   |
| RACGAP1  | Rac GTPase activating protein 1                      | 2.2E-02 | 3.8 | 222077_s_at |
| E2F8     | E2F transcription factor 8                           | 4.8E-02 | 3.8 | 219990_at   |
| CENPE    | centromere protein E, 312kDa                         | 1.5E-02 | 3.8 | 205046_at   |
| MKI67    | antigen identified by monoclonal antibody Ki-67      | 1.3E-02 | 3.8 | 212022_s_at |
| BIRC5    | baculoviral IAP repeat-containing 5                  | 6.2E-03 | 3.8 | 210334_x_at |
| BID      | BH3 interacting domain death agonist                 | 3.6E-02 | 3.9 | 211725_s_at |
| KLHL7    | kelch-like 7 (Drosophila)                            | 3.6E-03 | 3.9 | 220238_s_at |
| TMEM97   | transmembrane protein 97                             | 4.4E-03 | 3.9 | 212279_at   |
| KRT18    | keratin 18                                           | 1.3E-02 | 4.0 | 201596_x_at |
| FAM38A   | family with sequence similarity 38, member A         | 4.8E-02 | 4.0 | 202771_at   |
| CENPN    | centromere protein N                                 | 6.0E-03 | 4.3 | 219555_s_at |
| FOXM1    | forkhead box M1                                      | 1.2E-02 | 4.3 | 202580_x_at |
| SPAG4    | sperm associated antigen 4                           | 2.4E-02 | 4.3 | 219888_at   |
| PTTG3P   | pituitary tumor-transforming 3 (pseudogene)          | 7.8E-03 | 4.4 | 208511_at   |
| FLNB     | filamin B, beta                                      | 1.9E-02 | 4.4 | 208614_s_at |
| AURKB    | aurora kinase B                                      | 2.3E-02 | 4.5 | 209464_at   |

|          |                                                                                                      |         |     |             |
|----------|------------------------------------------------------------------------------------------------------|---------|-----|-------------|
| SIX1     | SIX homeobox 1                                                                                       | 3.2E-02 | 4.5 | 205817_at   |
| FAM49B   | family with sequence similarity 49, member B                                                         | 3.6E-03 | 4.5 | 217916_s_at |
| TMEM97   | transmembrane protein 97                                                                             | 3.6E-03 | 4.6 | 212281_s_at |
| TMEM97   | transmembrane protein 97                                                                             | 3.6E-03 | 4.6 | 212282_at   |
| KIF14    | kinesin family member 14                                                                             | 1.1E-02 | 4.7 | 206364_at   |
| GTSE1    | G-2 and S-phase expressed 1                                                                          | 8.3E-03 | 4.7 | 204318_s_at |
| SPAG5    | sperm associated antigen 5                                                                           | 1.2E-02 | 4.8 | 203145_at   |
| RAD51AP1 | RAD51 associated protein 1                                                                           | 2.6E-02 | 4.8 | 204146_at   |
| SPC25    | SPC25, NDC80 kinetochore complex component, homolog (S. cerevisiae)                                  | 1.7E-02 | 4.8 | 209891_at   |
| PRC1     | protein regulator of cytokinesis 1                                                                   | 3.5E-02 | 4.9 | 218009_s_at |
| HK2      | hexokinase 2                                                                                         | 1.5E-02 | 4.9 | 202934_at   |
| DNAJC22  | DnaJ (Hsp40) homolog, subfamily C, member 22                                                         | 3.5E-02 | 5.0 | 220441_at   |
| GGH      | gamma-glutamyl hydrolase (conjugase, foylylpolygammaglutamyl hydrolase)                              | 3.7E-02 | 5.0 | 203560_at   |
| KIF4A    | kinesin family member 4A                                                                             | 1.3E-02 | 5.0 | 218355_at   |
| KLHL7    | kelch-like 7 (Drosophila)                                                                            | 8.4E-03 | 5.0 | 220239_at   |
| CCNA2    | cyclin A2                                                                                            | 5.8E-03 | 5.1 | 213226_at   |
| TIAM1    | T-cell lymphoma invasion and metastasis 1                                                            | 2.1E-02 | 5.1 | 213135_at   |
| SLC16A3  | solute carrier family 16, member 3 (monocarboxylic acid transporter 4)                               | 3.2E-02 | 5.2 | 202856_s_at |
| MTHFD2   | methylenetetrahydrofolate dehydrogenase (NADP+ dependent) 2, methenyltetrahydrofolate cyclohydrolase | 1.1E-02 | 5.2 | 201761_at   |
| CENPF    | centromere protein F, 350/400ka (mitosin)                                                            | 4.5E-02 | 5.2 | 209172_s_at |
| TRIP13   | thyroid hormone receptor interactor 13                                                               | 3.6E-03 | 5.4 | 204033_at   |
| EZH2     | enhancer of zeste homolog 2 (Drosophila)                                                             | 2.1E-02 | 5.4 | 203358_s_at |
| CYP26B1  | cytochrome P450, family 26, subfamily B, polypeptide 1                                               | 2.0E-02 | 5.4 | 219825_at   |
| APOBEC3B | apolipoprotein B mRNA editing enzyme, catalytic polypeptide-like 3B                                  | 4.4E-03 | 5.6 | 206632_s_at |
| KIF2C    | kinesin family member 2C                                                                             | 1.0E-02 | 5.6 | 209408_at   |
| CKS2     | CDC28 protein kinase regulatory subunit 2                                                            | 1.9E-02 | 5.7 | 204170_s_at |
| KIF18A   | kinesin family member 18A                                                                            | 9.7E-03 | 5.7 | 221258_s_at |
| NCAPG    | non-SMC condensin I complex, subunit G                                                               | 3.3E-02 | 5.7 | 218662_s_at |
| CD226    | CD226 molecule                                                                                       | 2.4E-02 | 5.8 | 207315_at   |
| KIF15    | kinesin family member 15                                                                             | 9.4E-03 | 6.1 | 219306_at   |

|              |                                                              |                |            |                  |
|--------------|--------------------------------------------------------------|----------------|------------|------------------|
| KIF18B       | kinesin family member 18B                                    | 5.8E-03        | 6.2        | 222039_at        |
| GIN51        | GIN5 complex subunit 1 (Psf1 homolog)                        | 1.5E-02        | 6.2        | 206102_at        |
| NUSAP1       | nucleolar and spindle associated protein 1                   | 4.6E-02        | 6.3        | 219978_s_at      |
| CCNA2        | cyclin A2                                                    | 1.2E-02        | 6.6        | 203418_at        |
| DEPDC1       | DEP domain containing 1                                      | 4.7E-03        | 6.8        | 220295_x_at      |
| CRABP2       | cellular retinoic acid binding protein 2                     | 4.1E-02        | 7.0        | 202575_at        |
| CDC20        | cell division cycle 20 homolog (S. cerevisiae)               | 9.0E-03        | 7.0        | 202870_s_at      |
| BIRC5        | baculoviral IAP repeat-containing 5                          | 4.7E-03        | 7.2        | 202094_at        |
| CCNB2        | cyclin B2                                                    | 1.5E-02        | 7.2        | 202705_at        |
| CCNB1        | cyclin B1                                                    | 3.6E-03        | 7.2        | 214710_s_at      |
| CDKN3        | cyclin-dependent kinase inhibitor 3                          | 4.7E-03        | 7.4        | 209714_s_at      |
| NCAPG        | non-SMC condensin I complex, subunit G                       | 1.9E-02        | 7.5        | 218663_at        |
| KIF11        | kinesin family member 11                                     | 1.5E-02        | 7.7        | 204444_at        |
| CENPF        | centromere protein F, 350/400ka (mitosin)                    | 2.7E-02        | 7.7        | 207828_s_at      |
| CCNE2        | cyclin E2                                                    | 2.0E-02        | 7.8        | 205034_at        |
| DLGAP5       | discs, large (Drosophila) homolog-associated protein 5       | 4.9E-03        | 8.0        | 203764_at        |
| AURKA        | aurora kinase A                                              | 7.7E-03        | 8.0        | 208079_s_at      |
| LMNB1        | lamin B1                                                     | 4.7E-03        | 8.0        | 203276_at        |
| SHCBP1       | SHC SH2-domain binding protein 1                             | 2.8E-02        | 8.1        | 219493_at        |
| AURKA        | aurora kinase A                                              | 4.7E-03        | 8.2        | 204092_s_at      |
| UBE2C        | ubiquitin-conjugating enzyme E2C                             | 8.4E-03        | 8.4        | 202954_at        |
| CDK1         | cyclin-dependent kinase 1                                    | 1.5E-02        | 8.5        | 203214_x_at      |
| <b>WNT5A</b> | <b>wingless-type MMTV integration site family, member 5A</b> | <b>3.9E-02</b> | <b>8.6</b> | <b>213425_at</b> |
| TPX2         | TPX2, microtubule-associated, homolog (Xenopus laevis)       | 9.4E-03        | 8.7        | 210052_s_at      |
| MARCKSL1     | MARCKS-like 1                                                | 7.8E-03        | 8.8        | 200644_at        |
| CDK1         | cyclin-dependent kinase 1                                    | 1.9E-02        | 9.0        | 210559_s_at      |
| HMMR         | hyaluronan-mediated motility receptor (RHAMM)                | 4.7E-03        | 9.0        | 209709_s_at      |
| FOXL2        | forkhead box L2                                              | 3.2E-02        | 9.1        | 220102_at        |
| CENPA        | centromere protein A                                         | 4.7E-03        | 9.1        | 204962_s_at      |
| TOP2A        | topoisomerase (DNA) II alpha 170kDa                          | 4.1E-02        | 9.3        | 201292_at        |
| CDK1         | cyclin-dependent kinase 1                                    | 2.2E-02        | 9.4        | 203213_at        |
| DUSP2        | dual specificity phosphatase 2                               | 2.1E-02        | 9.6        | 204794_at        |
| MSX1         | msh homeobox 1                                               | 2.0E-02        | 9.8        | 205932_s_at      |
| TTK          | TTK protein kinase                                           | 8.3E-03        | 10.1       | 204822_at        |
| PCOLCE       | procollagen C-endopeptidase enhancer                         | 2.8E-02        | 10.3       | 202465_at        |

|         |                                                                      |         |       |             |
|---------|----------------------------------------------------------------------|---------|-------|-------------|
| VAMP8   | vesicle-associated membrane protein 8 (endobrevin)                   | 9.2E-03 | 11.4  | 202546_at   |
| OSR2    | odd-skipped related 2 (Drosophila)                                   | 2.7E-02 | 11.5  | 213568_at   |
| RRM2    | ribonucleotide reductase M2                                          | 2.4E-02 | 11.5  | 201890_at   |
| PTTG1   | pituitary tumor-transforming 1                                       | 4.9E-03 | 12.8  | 203554_x_at |
| BUB1    | budding uninhibited by benzimidazoles 1 homolog (yeast)              | 6.4E-03 | 12.9  | 209642_at   |
| FAM38B  | family with sequence similarity 38, member B                         | 4.7E-02 | 13.6  | 219602_s_at |
| CEP55   | centrosomal protein 55kDa                                            | 5.1E-03 | 14.1  | 218542_at   |
| PBK     | PDZ binding kinase                                                   | 1.4E-02 | 14.2  | 219148_at   |
| HMMR    | hyaluronan-mediated motility receptor (RHAMM)                        | 4.7E-03 | 14.7  | 207165_at   |
| BIRC5   | baculoviral IAP repeat-containing 5                                  | 4.7E-03 | 14.9  | 202095_s_at |
| NEK2    | NIMA (never in mitosis gene a)-related kinase 2                      | 3.6E-03 | 15.2  | 204641_at   |
| DUSP4   | dual specificity phosphatase 4                                       | 3.3E-02 | 15.4  | 204015_s_at |
| ASPM    | asp (abnormal spindle) homolog, microcephaly associated (Drosophila) | 1.6E-02 | 15.4  | 219918_s_at |
| KIF20A  | kinesin family member 20A                                            | 3.6E-03 | 19.2  | 218755_at   |
| RGS10   | regulator of G-protein signaling 10                                  | 4.7E-03 | 25.8  | 204319_s_at |
| DUSP4   | dual specificity phosphatase 4                                       | 3.8E-02 | 28.8  | 204014_at   |
| ALDH1A2 | aldehyde dehydrogenase 1 family, member A2                           | 1.5E-02 | 127.0 | 207016_s_at |
